# Supplementary material for: Affordability of Different Isocaloric Healthy Diets in Germany—An Assessment of Food Prices for Seven Distinct Food Patterns
Source: MDPI journal article supplement (doi:10.3390/nu13093037), 2021-08-30
Supplement: s1 [file s1]

# Affordability of Different Isocaloric Healthy Diets in Germany—An Assessment of Food Prices for Seven Distinct Food Patterns

## Supplementary materials: List of food and beverage items

### Food group 1: Starchy plant products

|                        |                |                            |                  |                   |
|------------------------|----------------|----------------------------|------------------|-------------------|
| Whole wheat toast      | Bread roll     | Soft oat meal flakes       | Tortilla (wheat) | Plain corn flakes |
| Butter toast           | Grain rolls    | Pasta (durum wheat)        | Couscous         | Dumpling dough    |
| White wheat crispbread | English muffin | Pasta sheets (durum wheat) | Bulgur           | Pizza dough       |
| Whole rye crispbread   | Baguette       | Potatoes                   | Rice             | Breadcrumbs       |
| Whole grain bread      | Oatmeal        | Gnocchi                    |                  |                   |

### Food group 2: Vegetables and salads

|               |                |                      |               |                      |
|---------------|----------------|----------------------|---------------|----------------------|
| Paprika (red) | Basil          | Spinach (frozen)     | Capers (can)  | Kohlrabi             |
| Broccoli      | Garlic         | Green beans (frozen) | Cucumber      | Lentils (raw)        |
| Peas (frozen) | Parsley        | Ruccola              | Corn (can)    | Red cabbage (frozen) |
| Carrots       | Celery         | Cauliflower          | Leaf lettuce  |                      |
| Onion         | Tomatoes       | Chickpeas            | Beans (white) |                      |
| Zucchini      | Olives (black) | Mushrooms            | Kidney beans  |                      |

### Food group 3: Fruits

|                       |           |         |           |           |
|-----------------------|-----------|---------|-----------|-----------|
| Raspberries (frozen)  | Tangerine | Grapes  | Nut mix   | Hazelnuts |
| Strawberries (frozen) | Pear      | Lemon   | Walnuts   |           |
| Pineapple             | Apple     | Banana  | Pistachio |           |
| Kiwi                  | Dates     | Almonds | Linseed   |           |

### Food group 4: Milk and dairy products

|                            |                             |                 |                      |                             |
|----------------------------|-----------------------------|-----------------|----------------------|-----------------------------|
| Yoghurt with crispy grains | Cream cheese                | Cream           | Sheep cheese         | Harzer cheese (hard cheese) |
| Gouda (slices)             | Mozzarella (45 % fat)       | Whipped cream   | Camembert            | Feta cheese                 |
| Rice pudding (chocolate)   | Mozzarella (20 % fat)       | Parmesan cheese | Yogurt (vanilla)     | Grained cream cheese        |
| Low fat creme cheese       | Natural yogurt (normal fat) | Milk (1.5% fat) | Pudding (chocolate)  | Emmentaler                  |
| Creme fraiche cheese       | Natural yogurt (low fat)    | Milk (3.5% fat) | Grilled / pan cheese |                             |

### Food group 5: Eggs, fish, processed and unprocessed meat products

|             |                      |                |            |                       |
|-------------|----------------------|----------------|------------|-----------------------|
| Beef (meat) | Turkey breast (meat) | Salami sausage | Tuna (can) | Fish fingers (frozen) |
|-------------|----------------------|----------------|------------|-----------------------|

|                           |                                |                 |                                        |                |
|---------------------------|--------------------------------|-----------------|----------------------------------------|----------------|
| Minced meat (pork / beef) | Schnitzel Cordon Bleu (frozen) | Cooked ham      | Salmon (frozen)                        | Gourmet fillet |
| Chicken breast (meat)     | Cracker sausage                | Bacon           | Sea bream / sea salmon fillet (frozen) | Chicken egg    |
| Duck (frozen)             | Turkey breast (sausage)        | Wiener sausages | Fried fish (frozen)                    |                |

#### **Food group 6: Oils and fats**

|              |               |         |                  |                 |
|--------------|---------------|---------|------------------|-----------------|
| Olive oil    | Sunflower oil | Vinegar | Balsamic vinegar | Butter (salted) |
| Rapeseed oil | Corn oil      |         |                  |                 |

#### **Food group 7: Beverages**

|               |                |             |              |            |
|---------------|----------------|-------------|--------------|------------|
| Mineral water | Apple spritzer | Fruit juice | Coconut milk | Rice drink |
| Café Crema    | Orange juice   |             |              |            |

#### **Food group 8: Spices**

|              |               |              |                 |         |
|--------------|---------------|--------------|-----------------|---------|
| Mustard      | Seasoned Salt | Tomato paste | Vegetable broth | Oregano |
| Curry powder | Tomato sauce  | Meatsoup     | Pesto (red)     | Thyme   |

#### **Food group 9: Highly processed food items and ready-to-eat meals**

|                            |                                  |                  |                       |            |
|----------------------------|----------------------------------|------------------|-----------------------|------------|
| Lasagna (frozen)           | Pasta salad                      | Noodle soup      | Dumplings (frozen)    | Soy yogurt |
| Paella / rice pan (frozen) | Meat salad                       | Goulash (can)    | Potato fries (frozen) | Tofu       |
| Chili con carne (frozen)   | Sandwich (with poultry / salami) | Pizza Margherita | Hummus                |            |

#### **Food group 10: Snacks and sweets**

|                 |                          |       |                  |                |
|-----------------|--------------------------|-------|------------------|----------------|
| Chips (paprika) | Chocolate cream (spread) | Honey | Jam (orange)     | Pretzel Sticks |
| Chocolate       | Chocolate biscuit        | Sugar | Jam (strawberry) | Gummy bears    |
